# Supplementary material for: Different congenital hydrocephalus–associated mutations in Trim71 impair stem cell differentiation via distinct gain-of-function mechanisms
Source: PLoS Biol. 2023 Feb 9;21(2):e3001947. doi: 10.1371/journal.pbio.3001947 (PMC9910693; doi:10.1371/journal.pbio.3001947)
Supplement: S3 Data — (XLSX) [file pbio.3001947.s016.xlsx]

## Sheet: Figure4B
	WT	WT	WT	R595H	R595H	R595H	R783H	R783H	R783H
Ctnnb1	1	1	1	0.28	0.32	0.35	1.1	1.15	0.97
Lsd1	1	1	1	1.05	0.98	1.07	0.42	0.52	0.55

## Sheet: Figure4C
	WT	WT	WT	R595H	R595H	R595H	R783H	R783H	R783H
Ctnnb1	1.01465	0.988562	0.996962	0.987829	0.942515	0.840768	0.97651	0.886291	1.0021
Lsd1	0.953709	1.01914	1.02885	0.976328	0.986661	1.05444	0.965561	0.892866	1.02049

## Sheet: Figure4E
	WT	WT	WT	R595H	R595H	R595H	R783H	R783H	R783H
RNP	15.02	13.8536	15.5822	23.2161	22.6962	25.9209	15.7688	17.7361	16.1194
80S	18.8348	19.2835	19.3541	33.7464	34.1201	27.6714	19.1398	20.2651	18.3495
Polysome	66.1452	66.863	65.0637	43.0375	43.1836	46.4077	65.0914	61.9988	65.5311

## Sheet: Figure4F
	WT	WT	WT	R595H	R595H	R595H	R783H	R783H	R783H
RNP	10.5661	9.45554	12.388	11.5949	14.4419	11.8945	16.9859	17.1936	15.4599
80S	13.6533	14.2794	13.8941	15.6768	16.1868	15.5352	27.3555	30.2182	30.6317
Polysome	75.7806	76.265	73.7179	72.7283	69.3713	72.5704	55.6587	52.5882	53.9084

## Sheet: Figure4G
	WT	WT	WT	R595H	R595H	R595H	R783H	R783H	R783H
RNP	51.246	52.2852	45.0643	53.9501	52.7211	53.0487	48.5178	50.2204	49.9594
80S	21.0345	21.3429	24.3874	21.8261	20.9697	21.0322	26.85	26.3205	25.5638
Polysome	27.7195	26.3719	30.5483	24.2238	26.3092	25.9191	24.6322	23.4592	24.4767

## Sheet: Figure4I
	Vector	Vector	Vector	Trim71	Trim71	Trim71	R595H	R595H	R595H	R783H	R783H	R783H
Ctnnb1	1	1	1	0.92	0.96	0.99	0.52	0.42	0.55	1.04	1.07	0.98
Lsd1	1	1	1	0.97	0.99	1.05	1.1	1.07	1.05	0.43	0.45	0.49

## Sheet: Figure4J
	Vector	Vector	Vector	Trim71	Trim71	Trim71	R595H	R595H	R595H	R783H	R783H	R783H
Ctnnb1	0.92	1.03	1.05	0.9	0.89	0.98	1.01	0.94	0.92	0.89	0.96	1.05
Lsd1	0.92	1.05	1.03	0.85	0.95	0.97	0.92	1.05	0.9	0.9	0.88	1.02
