# Supplementary material for: Different congenital hydrocephalus–associated mutations in Trim71 impair stem cell differentiation via distinct gain-of-function mechanisms
Source: PLoS Biol. 2023 Feb 9;21(2):e3001947. doi: 10.1371/journal.pbio.3001947 (PMC9910693; doi:10.1371/journal.pbio.3001947)
Supplement: S10 Data — (XLSX) [file pbio.3001947.s023.xlsx]

## Sheet: Sheet1
	WT	WT	WT	R595H/+	R595H/+	R595H/+	R595H	R595H	R595H	R783H/+	R783H/+	R783H/+	R783H	R783H	R783H	Trim71_KO	Trim71_KO	Trim71_KO
Otx2	0.968542	1.02945	1.00294	1.88262	3.39193	1.96811	3.90814	3.7645	2.14239	1.80997	2.04281	2.04294	5.49218	4.99688	5.11008	0.0186167	0.0133233	0.016948
Fgf5	1.01291	0.943006	1.04692	3.30987	3.88051	3.404	3.68402	3.74002	4.19701	4.99598	4.98183	5.61075	3.49323	3.69938	4.15001	0.103699	0.121212	0.106595
Pax6	1.01226	0.945777	1.04453	4.84411	4.58496	5.11562	6.36882	7.40769	6.54076	4.58828	4.57593	5.12307	6.8247	7.20676	8.0383	0.113386	0.131505	0.116392
Sox1	0.970091	1.02796	1.0028	4.4604	4.30452	2.19356	7.45235	6.51873	7.77348	3.49766	3.9238	3.92404	5.245	4.79459	4.89772	0.022181	0.0161419	0.0202879
Runx2	0.936942	1.0682	0.999155	0.10218	0.159265	0.135599	0.529161	0.584368	0.583853	0.627951	0.783509	0.829934	0.114306	0.152668	0.116391	0.109505	0.094283	0.118864
Flk1	1.02578	0.978945	0.995831	0.0807795	0.0793055	0.0801703	0.832988	0.771495	0.75134	1.14966	1.00851	1.17127	0.0880065	0.0912829	0.0802708	0.319264	0.301504	0.320743
Eomes3	0.995615	1.02781	0.977227	0.439384	0.486468	0.503352	0.359214	0.323972	0.372198	0.209732	0.208993	0.212957	0.399931	0.419465	0.497732	0.0191414	0.02866	0.0249457
FoxA2	0.92349	0.987015	1.0971	0.621976	0.718935	0.676513	0.974775	1.12477	1.00518	0.552626	0.636726	0.671744	0.874028	0.945636	1.02098	0.483797	0.485307	0.629517
